# Supplementary material
Source: PubMed Central journal article supplement (PMC2553320)
Supplement: NIHMS61157-supplement-si20060220_015.pdf [file NIHMS61157-supplement-si20060220_015.pdf]

## **Supporting information**

### **The Structural Basis of the Inhibition of Golgi $\alpha$ -Mannosidase II by Mannostatin A and the Role of the Thiomethyl Moiety in Ligand-Protein Interactions**

Sameer P. Kawatkar, Douglas A Kuntz, Robert J. Woods, David R. Rose\* and Geert-Jan Boons\*

**Table 1S:** Statistics for Data Collection and Refinement

| Complex with:                                                                  | <b>Manostatin A</b> | <b>Benzyl-Mannostatin</b> |
|--------------------------------------------------------------------------------|---------------------|---------------------------|
| PDB code                                                                       | <b>2F7O</b>         | <b>2F7P</b>               |
| HET symbol                                                                     | MSN                 | SK2                       |
| Space Group                                                                    |                     |                           |
| Cell dimensions (Å)                                                            | 69.00/109.30/138.35 | 68.95/109.87/139.04       |
| <b>Data Collection</b> (values in parenthesis represent high resolution shell) |                     |                           |
| Resolution (Å)                                                                 | 30-1.45 (1.48-1.45) | 30-1.28 (1.31-1.28)       |
| Unique Reflections/Redundancy                                                  | 181,459/4.1         | 266,693/6.7               |
| I/sigma I                                                                      | 12.3 (2.9)          | 16.6 (2.7)                |
| % Completeness                                                                 | 97.1 (92.3)         | 97.7 (79.8)               |
| R merge                                                                        | 0.10 (0.463)        | 0.10 (0.575)              |
| Wilson B (Å <sup>2</sup> )                                                     | 14.5                | 11.1                      |
| <b>Structure Refinement</b>                                                    |                     |                           |
| R <sub>work</sub> /R <sub>free</sub> (reflections for R <sub>free</sub> )      | 0.206/0.235 (4103)  | 0.166/0.180 (4884)        |
| Amino Acids/Alternate conformers                                               | 1014/11             | 1014/37                   |
| Water Molecules                                                                | 1048                | 1226                      |
| rmsd bonds (Å)                                                                 | 0.0203              | 0.017                     |
| rmsd angles (°)                                                                | 2.0                 | 1.8                       |
| AverageBFactor (Å <sup>2</sup> )                                               |                     |                           |
| Overall                                                                        | 16.9                | 13.8                      |
| Protein Main Chain                                                             | 14.6                | 10.7                      |
| Protein Side Chain                                                             | 16.7                | 13.6                      |
| Water                                                                          | 26.6                | 24.9                      |
| Inhibitor                                                                      | 8.7                 | 12.0                      |
| Zn                                                                             | 8.4                 | 5.9                       |
| MPD                                                                            | 21.5                | 13.6                      |
| PO <sub>4</sub>                                                                | 30.5                | -                         |

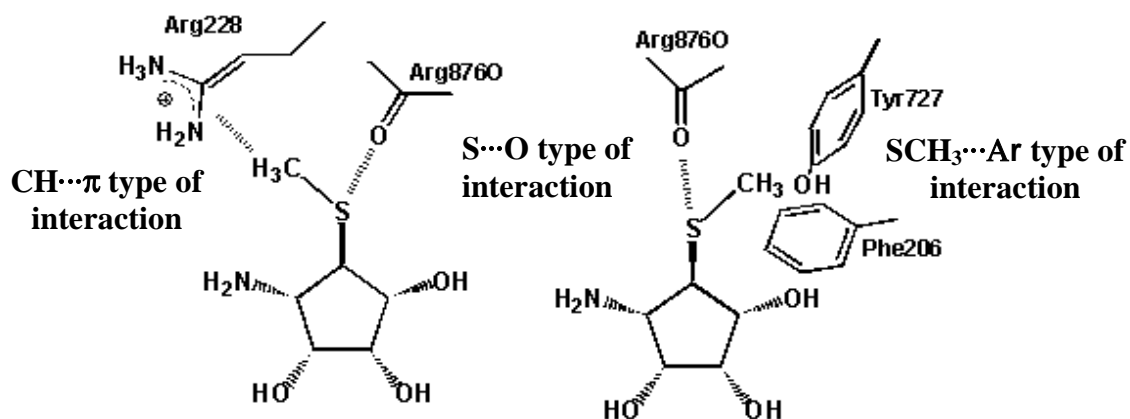

**Figure 1S.** Different thiomethyl interactions in cf1 and cf2 conformation of methyl carbon atom, as observed in the X-ray structures of Mannostatin A complexed with dGMII.

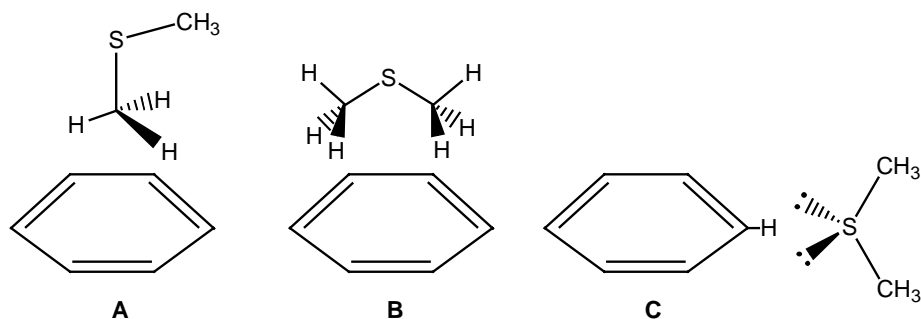

**Figure 2S.** Different models studied using ab initio calculations by Pranata. These models gave the estimates of the contribution of thiomethyl interaction with the benzene ring towards the stability of the system.

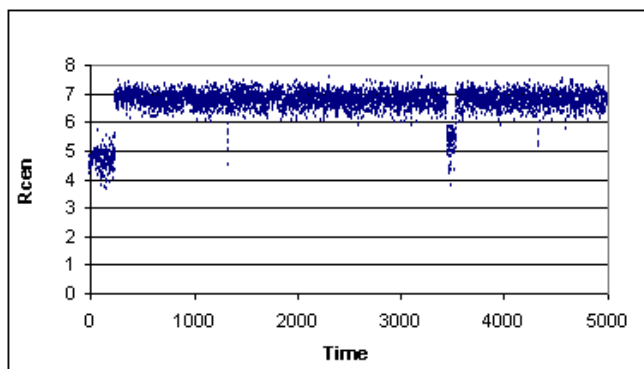

**Figure 3S.** Plot of distance between the centroid of the phenyl ring in 2 and the sulfur atom in 2 as a function of time, in 5-ns trajectory for MD simulation of free ligand in water. The plot indicates that the intramolecular interaction observed in the X-ray structure may not be strong interaction.

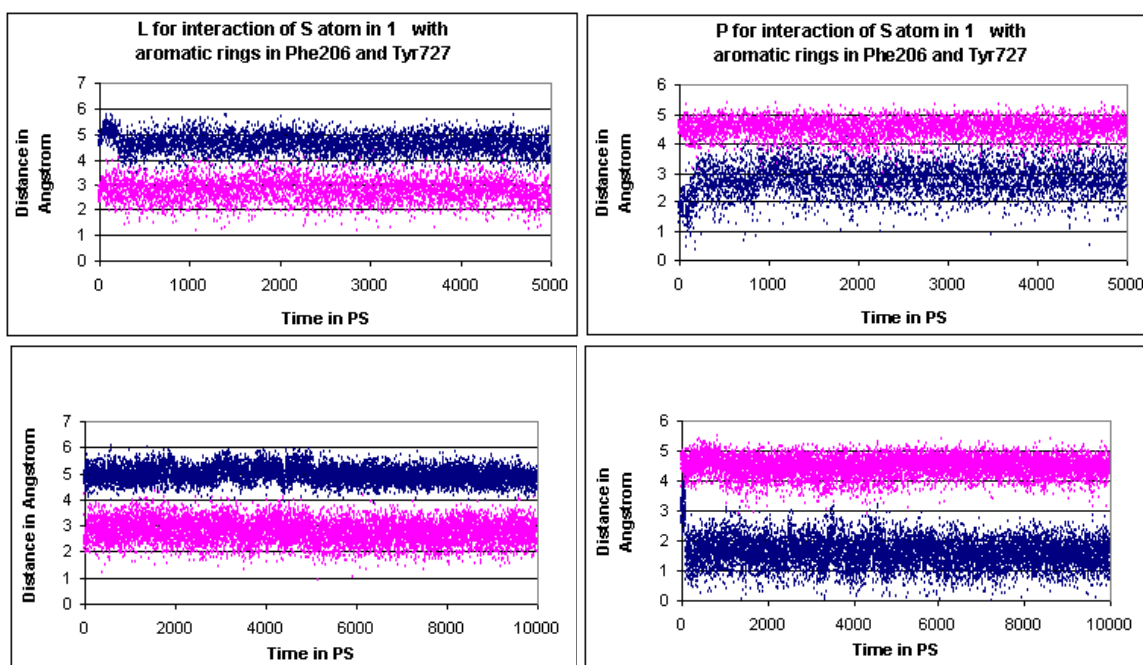

**Figure 4S.** Plots of perpendicular (P) and horizontal distance (L) between the sulfur atoms in 1 and 2, and the centroid of the phenyl ring in Phe206 and Tyr727 (blue – Phe206 and magenta – Tyr727) as a function of time in 10-ns trajectories of ligand-protein complexes. These plots indicate that the interactions made by thiomethyl ether with the Phe206 and Tyr727 are retained.

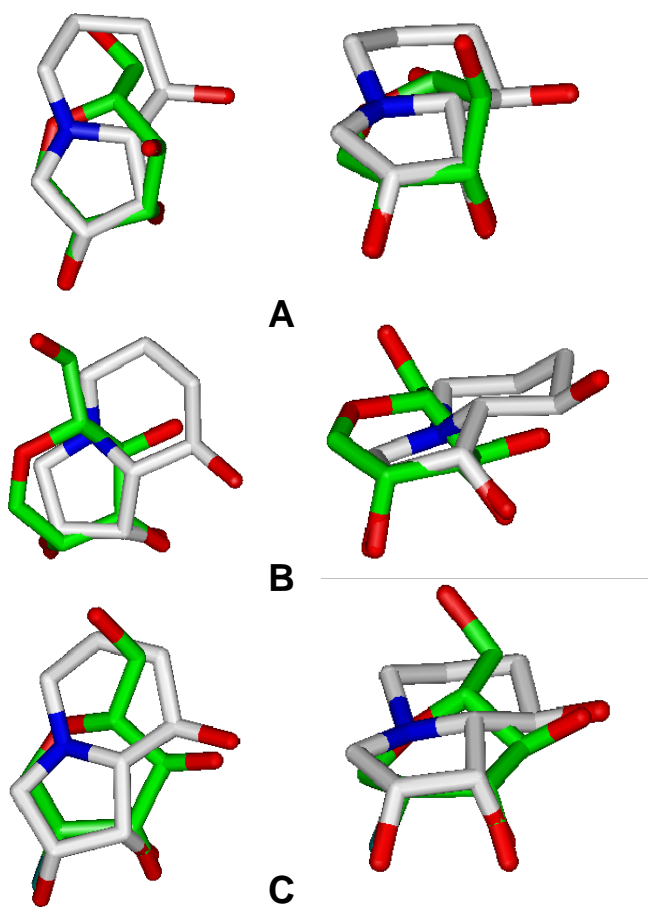

**Figure 5S.** Overlays of swainsonine (in bound conformation) with flap-up (A) and flap-down (B) oxacarbenium, and covalent intermediate (C, PDB ID 1QX1).

## Complete references.

55. Case, D. A.; Pearlman, D. A.; Caldwell, J. W.; Cheatham III, T. E.; Wang, J.; Ross, W. S.; Simmerling, C. L.; Merz, K. M.; Stanton, R. V.; Cheng, A. L.; Vincent, J. J.; Crowley, M.; Tsui, V.; Radmer, R. J.; Duan, Y.; Pitera, J.; Massova, I.; Seibel, G. L.; Singh, P. K. W.; Kollman, P. A. *Amber 7.0*, University of California: San Francisco, CA, 2002.
59. Frisch, M. J.; Trucks, G. W.; Schlegel, H. B.; Scuseria, G. E.; Robb, M. A.; Cheeseman, J. R.; Zakrzewski, V. G.; Montgomery, J. A.; Stratmann, J., R. E.; Burant, J. C.; Dapprich, S.; Millam, J. M.; Daniels, A. D.; Kudin, K. N.; Strain, M. C.; Farkas, O.; Tomasi, J.; Barone, V.; Cossi, M.; Cammi, R.; Mennucci, B.; Pomelli, C.; Adamo, C.; Clifford, S.; Ochterski, J.; Petersson, G. A.; Ayala, P. Y.; Cui, Q.; Morokuma, K.; Malick, D. K.; Rabuck, A. D.; Raghavachari, K.; Foresman, J. B.; Cioslowski, J.; Ortiz, J. V.; Baboul, A. G.; Stefanov, B. B.; Liu, G.; Liashenko, A.; Piskorz, P.; Komaromi, I.; Gomperts, R.; Martin, R. L.; Fox, D. J.; Keith, T.; Al-Laham, M. A.; Peng, C. Y.; Nanayakkara, A.; Challacombe, M.; Gill, P. M. W.; Johnson, B.; Chen, W.; Wong, M. W.; Andres, J. L.; Gonzalez, C.; Head-Gordon, M.; Replogle, E. S.; Pople, J. A. *Gaussian 98*, Revision A.11.3 ed; Gaussian, Inc.: Pittsburgh, PA, 2002.
